# Supplementary material
Source: ML conference proceedings conference paper supplement (https://openaccess.thecvf.com/content/CVPR2026/html/Zhang_SpikeTrack_A_Spike-driven_CVPR_2026_paper.html)
Supplement: Supplementary file 1 [file Supplementary_Material.pdf › Supplementary_Material.pdf]

# SpikeTrack: A Spike-driven Framework for Efficient Visual Tracking

## Supplementary Material

In the supplementary materials, Sec. 1 presents a visual comparison of the tracking results. Sec. 2 presents more exploring experiments. Sec. 3 presents SpikeTrack’s performance on each attribute in the LaSOT Benchmark’s attribute challenge. Finally, Sec. 4 explains the method for estimating energy consumption and reports the spiking firing rate (SFR) for each layer of SpikeTrack-B256-T3.

### 1. Visualization

#### 1.1. Visualization Retrieval Results

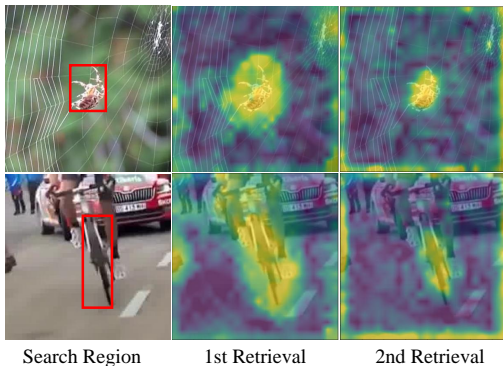

Figure 1. Visualization of the spike tensor obtained after two retrievals in MRM, based on spike firing rate.

To further demonstrate the effectiveness of recurrent retrieval, we visualize the retrieval results at each iteration based on the per-pixel channel spike firing rate. Fig. 1 demonstrate a progressive attention refinement process, with increasingly concentrated spike firing locations and reduced noise, validating the recurrent design’s effectiveness. This result also supports our hypothesis regarding the experimental observations in Fig. ??: excessive recurrent iterations narrow the attention excessively, causing useful information to be overlooked.

#### 1.2. Visualization Tracking Results

As shown in Fig. 2, we present the tracking results of SpikeTrack, efficiency-oriented ANNs, and precision-oriented ANNs. The video sequences include challenging scenarios such as deformation, blur, and similar objects, demonstrating SpikeTrack’s ability to maintain accurate tracking over extended time spans.

Table 1. Template update parameter sensitivity analysis of SpikeTrack-B256-T3. Rows indicate update confidence and columns indicate update interval. Underlines indicate default unified settings of the SpikeTrack Family for short- and long-term datasets.

| GOT  | <u>25</u> | 35   | 45   | 55   | LaSOT      | <u>40</u> | 60   | 80   |
|------|-----------|------|------|------|------------|-----------|------|------|
| 0.65 | 72.2      | 72.5 | 72.2 | 72.1 | 0.65       | 66.8      | 66.8 | 67.1 |
| 0.7  | 72.2      | 72.2 | 72.0 | 71.9 | 0.7        | 67.0      | 67.2 | 67.1 |
| 0.75 | 71.8      | 72.4 | 71.6 | 71.8 | 0.75       | 66.7      | 67.6 | 66.7 |
| 0.8  | 71.7      | 72.3 | 71.3 | 71.7 | <u>0.8</u> | 67.1      | 67.5 | 66.8 |

### 2. More Exploring Experiments

#### 2.1. Updating Hyper-parameters

We conduct a sensitivity analysis about updating hyper-parameters. As shown in Tab. 1, within reasonable ranges, lower update intervals and thresholds favor short-term tracking, whereas long-term tracking exhibits the opposite trend, suggesting a stronger dependence on stable templates. Note that our default setting isn’t optimal since we use unified settings for all datasets (except LaSOT) to show true generalization.

### 3. Performance of Attribute Challenges on LaSOT

As shown in Fig. 3, we provide a detailed comparison of the scores achieved by SpikeTrack and other ANN tracking methods for each challenge attribute in LaSOT. These challenge attributes include: Illumination Variation (IV), Partial Occlusion (POC), Deformation (DEF), Motion Blur (MB), Camera Motion (CM), Rotation (ROT), Background Clutter (BC), Viewpoint Change (VC), Scale Variation (SV), Full Occlusion (FOC), Fast Motion (FM), Out-of-View (OV), Low Resolution (LR), Aspect Ratio Change (ARC).

### 4. Energy Consumption Estimation

#### 4.1. Spike-driven Operators in SNNs

Spike-driven operators are the foundation of low-power neuromorphic computing, especially for SNNs. In spike-driven convolution and MLP computations, matrix multiplication between weight matrices and input spike matrices can be implemented on neuromorphic chips as address-based additions [1]. In spike-driven attention mechanisms, the  $Q_S$ ,  $K_S$ , and  $V_S$  operations involve two matrix multiplications. Similar to Conv and MLP, selecting one side as the spike matrix and the other as the weight matrix transforms the computation into sparse additions. Table 2 shows a comparison of the energy consumption of ANN and Spike-driven SNN operators.

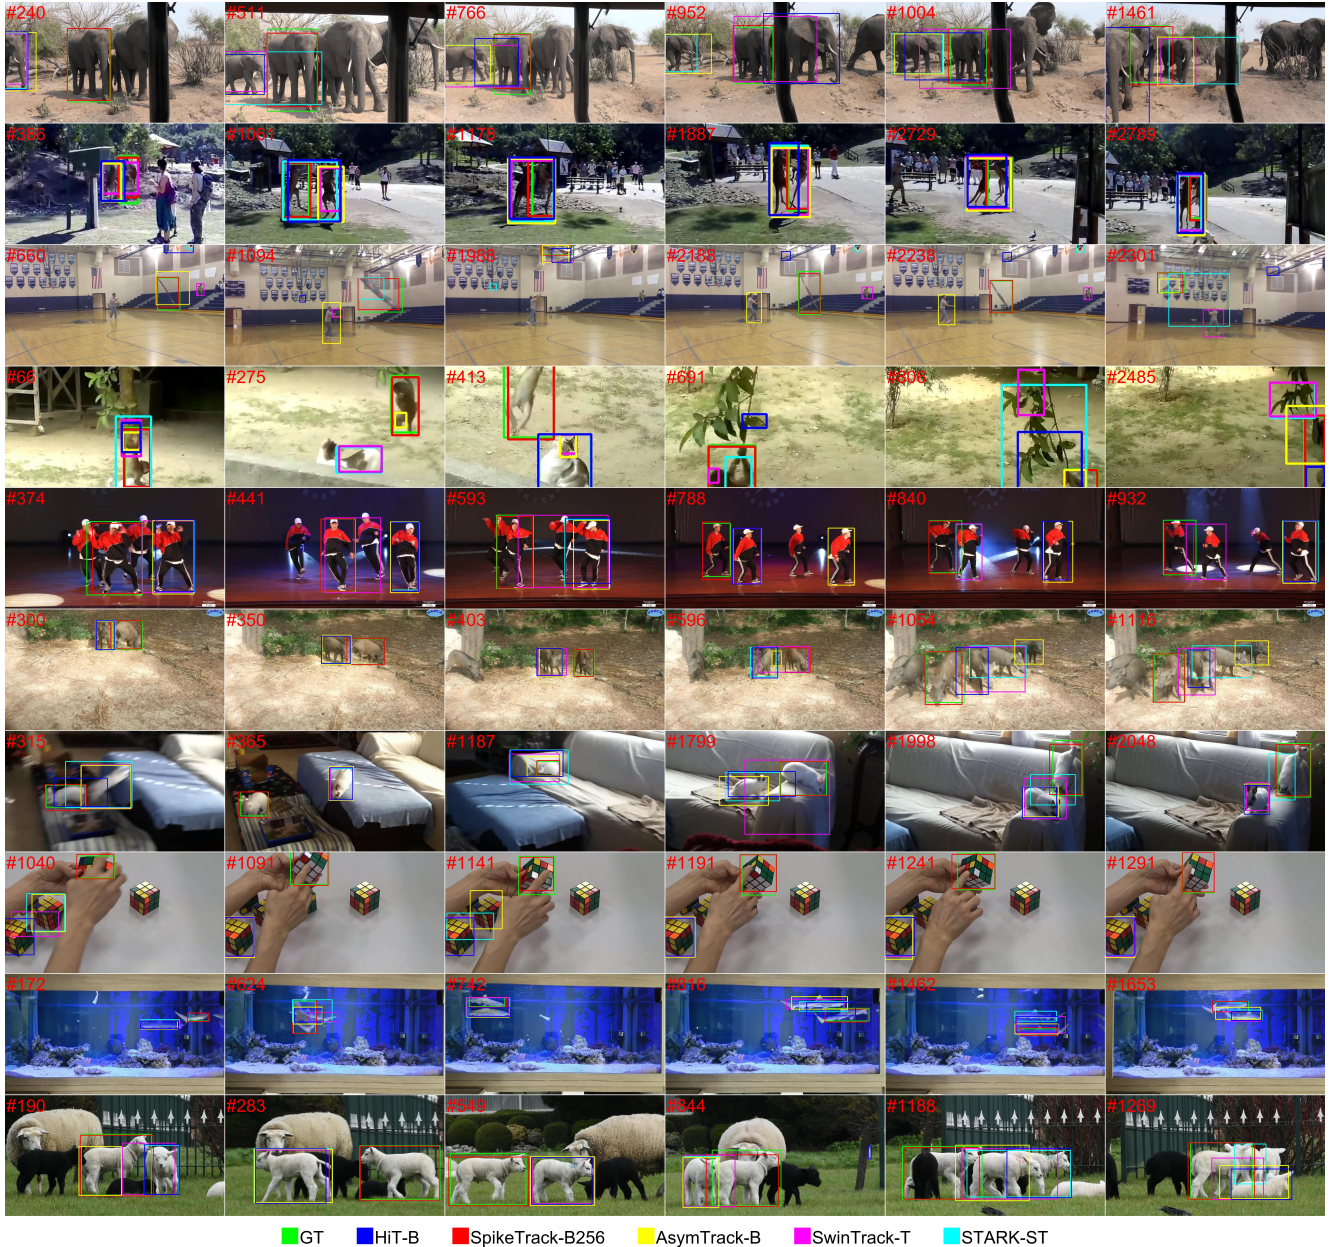

Figure 2. Visualization comparison of SpikeTrack and other ANN-based Trackers.

## 4.2. Energy Consumption of SpikeTrack

In this work, we use the same refined energy consumption evaluation method as recent SNN studies [3–8]. We first measure the spiking firing rate (the proportion of non-zero elements in the spike matrix,  $SFR$ ) of each layer, then calculate each layer’s energy consumption as its FLOPs multiplied by  $E_{AC}$  and the corresponding  $SFR$ , and finally sum the energy consumption across all layers. In 45nm technology [2], the energy of a  $MAC$  and an  $AC$  are  $E_{MAC} = 4.6pJ$  and  $E_{AC} = 0.9pJ$ , respectively.

The  $SFR$  of each layer is obtained by averaging the fir-

ing rates of the model over the large-scale benchmarks LaSOT and GOT-10K. In order to give readers an intuitive feeling about the spiking firing rate, we give the detailed spiking firing rates of SpikeTrack-B256-T3 in Tab. 3 (search branch) and Tab. 4 (template branch). Overall, the firing rates exhibit a decreasing trend from shallow to deep layers. The TemporalFusion-WeightMLP1 layer in the MRM module shows a relatively high firing rate, indicating that while the spatiotemporal membrane potential processing and recurrent retrieval introduced by the MRM module improve performance, they also increase energy consumption



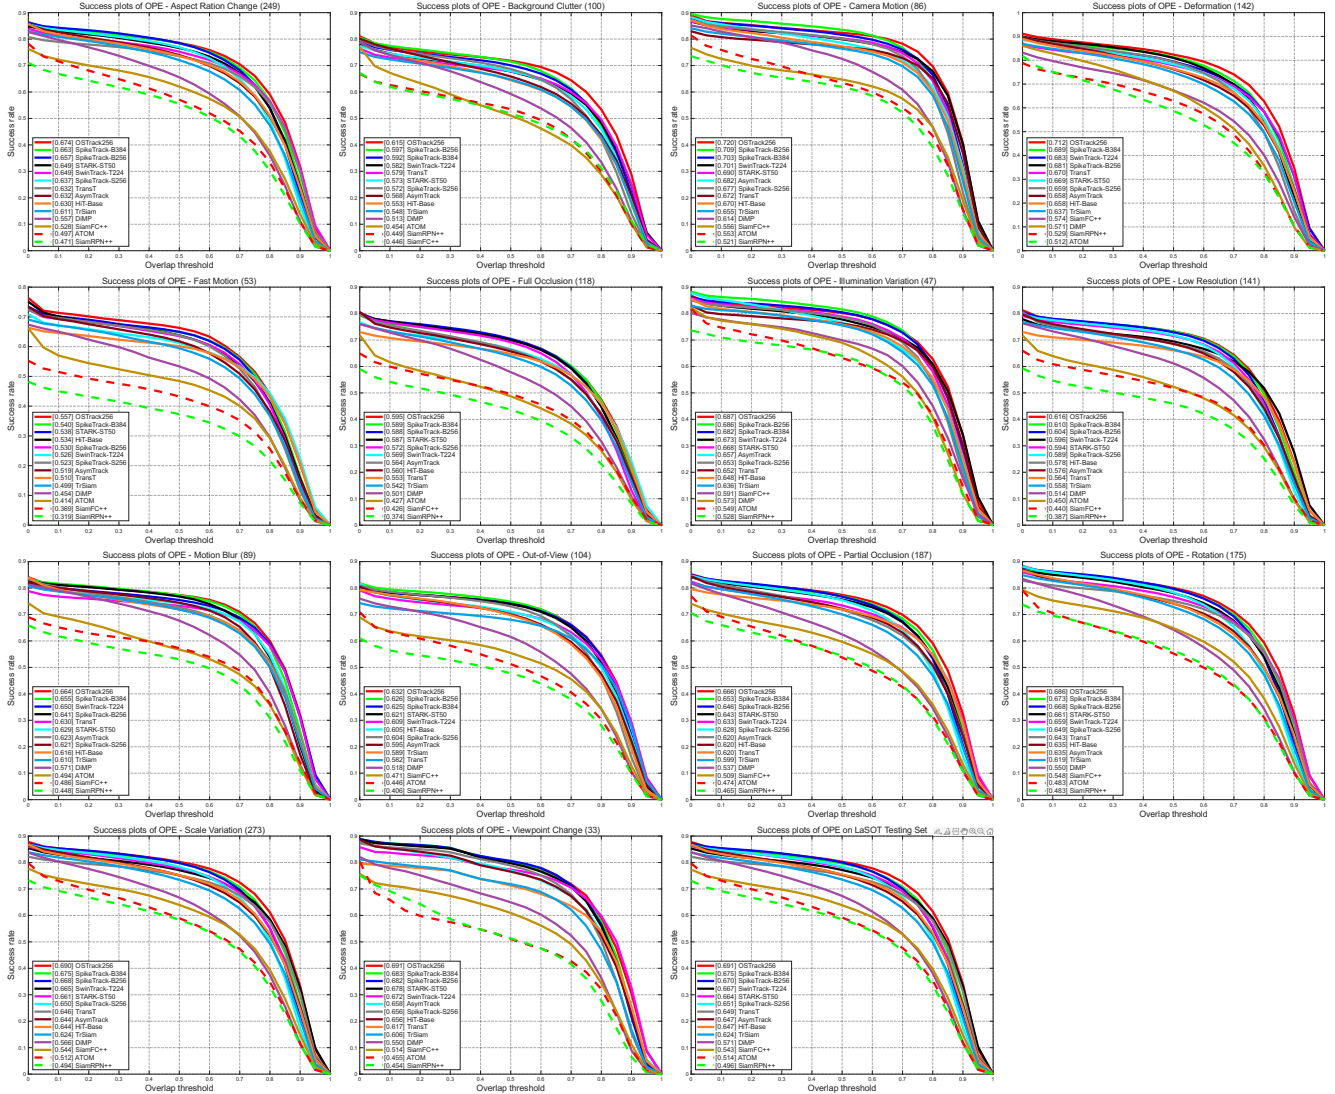

to some extent.

Notably, the NI-LIF neurons [3] are trained with normalized integer activation values, with the max integer capped at 4. During inference, these integers are mapped to equivalent spikes, which can naturally result in certain layers exhibiting an *SFR* greater than 1.

More SpikeTrack variations of spiking firing rate and energy consumption calculation tables can be found in the Excel document in the supplementary material ZIP.

Table 2. Energy evaluation.  $FL_{Conv}$  and  $FL_{MLP}$  represent the FLOPs of the Conv and MLP models in the ANNs, respectively.  $R$  denote the spiking firing rate (the proportion of non-zero elements in the spike matrix) of the layer corresponding to the operator.  $T$  is timestep.  $E_{MAC}$  and  $E_{AC}$  are the energy consumption of performing one MAC and one AC operation, respectively. In the spike-driven attention, the scale operation is avoided by incorporating the scale factor into the neuron’s leakage factor. The first downsampling layer uses  $MAC$  convolution, consistent with other works [4–8].

|                |              | ANN-based Tracker         | Spike-driven Tracker                      |
|----------------|--------------|---------------------------|-------------------------------------------|
| Conv           | First Conv   | $E_{MAC} \cdot FL_{Conv}$ | $E_{MAC} \cdot T \cdot R \cdot FL_{Conv}$ |
|                | Other Conv   | $E_{MAC} \cdot FL_{Conv}$ | $E_{AC} \cdot T \cdot R \cdot FL_{Conv}$  |
| Self-Attention | $Q, K, V$    | $E_{MAC} \cdot 3ND^2$     | $E_{AC} \cdot T \cdot R \cdot 3FL_{Conv}$ |
|                | $f(Q, K, V)$ | $E_{MAC} \cdot 2N^2D$     | $E_{AC} \cdot T \cdot R \cdot 2ND^2$      |
|                | Scale        | $E_M \cdot N^2$           | -                                         |
|                | Softmax      | $E_{MAC} \cdot 2N^2$      | -                                         |
|                | Linear       | $E_{MAC} \cdot FL_{MLP}$  | $E_{AC} \cdot T \cdot R \cdot FL_{MLP0}$  |
| MLP            | Layer1       | $E_{MAC} \cdot FL_{MLP1}$ | $E_{AC} \cdot T \cdot R \cdot FL_{MLP1}$  |
|                | Layer2       | $E_{MAC} \cdot FL_{MLP2}$ | $E_{AC} \cdot T \cdot R \cdot FL_{MLP2}$  |

Table 3. Layer spiking firing rates of SpikeTrack-B256-T3 Search Branch.

|                        |                         |                         | T1           | T2        | T3     |        |
|------------------------|-------------------------|-------------------------|--------------|-----------|--------|--------|
| Stage 1                | DownSampling            |                         | Conv         | 1         | -      |        |
|                        | ConvFormer Spike Block  | SepSpikeConv            | PWConv1      | 1.4643    | -      |        |
|                        |                         |                         | DWConv       | 1.3569    | -      |        |
|                        |                         | Channel Conv            | PWConv2      | 1.2556    | -      |        |
|                        |                         |                         | Conv1        | 1.5301    | -      |        |
|                        |                         | Conv2                   | 0.2497       | -         |        |        |
| Stage 2                | DownSampling            |                         | Conv         | 1.0722    | -      |        |
|                        | Memory Retrieval Module | Head- $Q$               | Head- $Q$    | 0.5670    | -      |        |
|                        |                         |                         | $Q_S1$       | 0.3496    | 0.3841 |        |
|                        |                         | SepSpikeConv            | PWConv       | 1.1416    | 1.1947 |        |
|                        |                         |                         | DWConv       | 0.3178    | 0.3532 |        |
|                        |                         | Project1                | Conv         | 0.4639    | 0.4746 |        |
|                        |                         |                         | $Q_S2$       | 0.6606    | 0.7157 |        |
|                        |                         | TemporalFusion          | WeightMLP1   | 1.7143    | 1.6588 |        |
|                        |                         |                         | WeightMLP2   | 0.5168    | 0.5279 |        |
|                        |                         | Project2                | Conv         | 0.3493    | -      |        |
|                        |                         |                         | Linear1      | 0.6840    | -      |        |
|                        |                         | Channel MLP             | Linear2      | 0.2197    | -      |        |
|                        |                         |                         |              |           |        |        |
|                        |                         | ConvFormer Spike Block  | SepSpikeConv | PWConv1   | 0.6638 | -      |
|                        |                         |                         |              | DWConv    | 0.9398 | -      |
|                        | Channel Conv            |                         | PWConv2      | 0.6144    | -      |        |
|                        |                         |                         | Conv1        | 0.9048    | -      |        |
|                        |                         |                         | Conv2        | 0.1488    | -      |        |
|                        | Stage 3                 | DownSampling            |              | Conv      | 0.7663 | -      |
|                        |                         | Memory Retrieval Module | Head- $Q$    | Head- $Q$ | 0.6318 | -      |
|                        |                         |                         |              | $Q_S1$    | 0.2818 | 0.3085 |
|                        |                         |                         | SepSpikeConv | PWConv    | 0.8162 | 0.9758 |
|                        |                         |                         |              | DWConv    | 0.3054 | 0.3400 |
|                        |                         |                         | Project1     | Conv      | 0.3661 | 0.3896 |
|                        |                         |                         |              | $Q_S2$    | 0.3456 | 0.3681 |
| TemporalFusion         |                         |                         | WeightMLP1   | 0.7749    | 0.8173 |        |
|                        |                         |                         | WeightMLP2   | 0.3484    | 0.3827 |        |
| Project2               |                         |                         | Conv         | 0.1389    | -      |        |
|                        |                         |                         | Linear1      | 0.6861    | -      |        |
| Channel MLP            |                         |                         | Linear2      | 0.1752    | -      |        |
|                        |                         |                         |              |           |        |        |
| ConvFormer Spike Block |                         |                         | SepSpikeConv | PWConv1   | 0.6677 | -      |
|                        |                         |                         |              | DWConv    | 0.9180 | -      |
|                        |                         | Channel Conv            | PWConv2      | 0.5269    | -      |        |
|                        |                         |                         | Conv1        | 0.6199    | -      |        |
|                        |                         |                         | Conv2        | 0.0906    | -      |        |
| ConvFormer Spike Block |                         | SepSpikeConv            | PWConv1      | 0.9326    | -      |        |
|                        |                         |                         | DWConv       | 0.5476    | -      |        |
|                        |                         | Channel Conv            | PWConv2      | 0.4813    | -      |        |
|                        |                         |                         | Conv1        | 0.6739    | -      |        |
|                        |                         |                         | Conv2        | 0.065     | -      |        |
| Stage 4                |                         | DownSampling            |              | Conv      | 0.8766 | -      |
|                        |                         | Memory Retrieval Module | Head- $Q$    | Head- $Q$ | 0.4919 | -      |
|                        | $Q_S1$                  |                         |              | 0.3510    | 0.3837 |        |
|                        | SepSpikeConv            |                         | PWConv       | 2.1617    | 2.3470 |        |
|                        |                         |                         | DWConv       | 0.3806    | 0.4072 |        |
|                        |                         |                         |              |           |        |        |

|                         |                |             |        |        |        |
|-------------------------|----------------|-------------|--------|--------|--------|
|                         | Project1       | Conv        | 0.4583 | 0.4769 | 0.5183 |
|                         |                | $Q_S2$      | 0.7903 | 0.8414 | 0.8667 |
|                         | TemporalFusion | WeightMLP1  | 2.8883 | 2.9805 | 3.0267 |
|                         |                | WeightMLP2  | 0.2744 | 0.2848 | 0.2924 |
|                         | Project2       | Conv        | 0.7324 | -      | -      |
|                         | Channel MLP    | Linear1     | 0.5211 | -      | -      |
|                         |                | Linear2     | 0.1942 | -      | -      |
| TransFormer Spike Block | SepSpikeConv   | PWConv1     | 0.5216 | -      | -      |
|                         |                | DWConv      | 0.8427 | -      | -      |
|                         |                | PWConv2     | 0.3655 | -      | -      |
|                         |                | Head- $QKV$ | 0.5699 | -      | -      |
|                         | SSA            | $Q_S$       | 1.0672 | -      | -      |
|                         |                | $K_S$       | 0.2967 | -      | -      |
|                         |                | $V_S$       | 0.7571 | -      | -      |
|                         |                | Linear      | 2.1776 | -      | -      |
|                         | Channel MLP    | Linear1     | 0.6194 | -      | -      |
|                         |                | Linear2     | 0.1132 | -      | -      |
| TransFormer Spike Block | SepSpikeConv   | PWConv1     | 0.7469 | -      | -      |
|                         |                | DWConv      | 0.7103 | -      | -      |
|                         |                | PWConv2     | 0.4588 | -      | -      |
|                         |                | Head- $QKV$ | 0.6988 | -      | -      |
|                         | SSA            | $Q_S$       | 0.7085 | -      | -      |
|                         |                | $K_S$       | 0.2105 | -      | -      |
|                         |                | $V_S$       | 0.3949 | -      | -      |
|                         |                | Linear      | 1.3788 | -      | -      |
|                         | Channel MLP    | Linear1     | 0.7699 | -      | -      |
|                         |                | Linear2     | 0.1025 | -      | -      |
| TransFormer Spike Block | SepSpikeConv   | PWConv1     | 0.7743 | -      | -      |
|                         |                | DWConv      | 0.5849 | -      | -      |
|                         |                | PWConv2     | 0.3319 | -      | -      |
|                         |                | Head- $QKV$ | 0.7370 | -      | -      |
|                         | SSA            | $Q_S$       | 0.7367 | -      | -      |
|                         |                | $K_S$       | 0.1592 | -      | -      |
|                         |                | $V_S$       | 0.5306 | -      | -      |
|                         |                | Linear      | 1.2955 | -      | -      |
|                         | Channel MLP    | Linear1     | 0.8817 | -      | -      |
|                         |                | Linear2     | 0.0799 | -      | -      |
| Memory Retrieval Module | SepSpikeConv   | Head- $Q$   | 0.8867 | -      | -      |
|                         |                | $Q_S1$      | 0.3233 | 0.3501 | 0.3357 |
|                         |                | PWConv      | 1.2107 | 1.4589 | 1.424  |
|                         |                | DWConv      | 0.3771 | 0.4003 | 0.3844 |
|                         | Project1       | Conv        | 0.4302 | 0.4495 | 0.4991 |
|                         |                | $Q_S2$      | 0.5933 | 0.6266 | 0.6632 |
|                         | TemporalFusion | WeightMLP1  | 1.7760 | 1.9401 | 2.0085 |
|                         |                | WeightMLP2  | 1.0628 | 1.1578 | 1.1791 |
|                         | Project2       | Conv        | 0.4434 | -      | -      |
|                         | Channel MLP    | Linear1     | 0.9183 | -      | -      |
|                         |                | Linear2     | 0.2099 | -      | -      |
| TransFormer Spike Block | SepSpikeConv   | PWConv1     | 0.9292 | -      | -      |
|                         |                | DWConv      | 0.6615 | -      | -      |
|                         |                | PWConv2     | 0.3422 | -      | -      |
|                         |                | Head- $QKV$ | 0.8495 | -      | -      |
|                         | SSA            | $Q_S$       | 0.7161 | -      | -      |
|                         |                |             |        |        |        |
|                         |                |             |        |        |        |

|                         |                         |                |             |        |        |        |
|-------------------------|-------------------------|----------------|-------------|--------|--------|--------|
| Stage 5                 | TransFormer Spike Block | Channel MLP    | $K_S$       | 0.1350 | -      | -      |
|                         |                         |                | $V_S$       | 0.4256 | -      | -      |
|                         |                         |                | Linear      | 1.0989 | -      | -      |
|                         |                         |                | Linear1     | 0.9172 | -      | -      |
|                         |                         |                | Linear2     | 0.0677 | -      | -      |
|                         |                         | SepSpikeConv   | PWConv1     | 0.8158 | -      | -      |
|                         |                         |                | DWConv      | 0.6410 | -      | -      |
|                         |                         |                | PWConv2     | 0.345  | -      | -      |
|                         |                         |                | Head- $QKV$ | 0.7505 | -      | -      |
|                         |                         |                | $Q_S$       | 0.7999 | -      | -      |
|                         | SSA                     | $K_S$          | 0.1222      | -      | -      |        |
|                         |                         | $V_S$          | 0.3271      | -      | -      |        |
|                         |                         | Linear         | 0.8896      | -      | -      |        |
|                         |                         | Linear1        | 0.9085      | -      | -      |        |
|                         |                         | Linear2        | 0.0744      | -      | -      |        |
|                         | TransFormer Spike Block | SepSpikeConv   | PWConv1     | 0.7901 | -      | -      |
|                         |                         |                | DWConv      | 0.6209 | -      | -      |
|                         |                         |                | PWConv2     | 0.2965 | -      | -      |
|                         |                         |                | Head- $QKV$ | 0.7643 | -      | -      |
|                         |                         |                | $Q_S$       | 0.7730 | -      | -      |
|                         |                         | SSA            | $K_S$       | 0.1993 | -      | -      |
|                         |                         |                | $V_S$       | 0.5176 | -      | -      |
|                         |                         |                | Linear      | 1.6896 | -      | -      |
|                         |                         |                | Linear1     | 0.8989 | -      | -      |
|                         |                         |                | Linear2     | 0.0871 | -      | -      |
|                         | Memory Retrieval Module | SepSpikeConv   | Head- $Q$   | 1.0431 | -      | -      |
|                         |                         |                | $Q_S1$      | 0.4587 | 0.4759 | 0.4673 |
|                         |                         |                | PWConv      | 1.5555 | 1.5786 | 1.4752 |
|                         |                         |                | DWConv      | 0.3697 | 0.3760 | 0.3707 |
|                         |                         |                | Project1    | Conv   | 0.5233 | 0.5438 |
|                         |                         | TemporalFusion | $Q_S2$      | 0.3806 | 0.4307 | 0.4813 |
|                         |                         |                | WeightMLP1  | 1.2338 | 1.489  | 1.5396 |
| WeightMLP2              |                         |                | 0.9094      | 1.0829 | 1.1119 |        |
| Project2                |                         |                | Conv        | 0.2615 | -      | -      |
| Channel MLP             |                         |                | Linear1     | 1.0764 | -      | -      |
| TransFormer Spike Block | SepSpikeConv            | Linear2        | 0.1975      | -      | -      |        |
|                         |                         | PWConv1        | 1.1655      | -      | -      |        |
|                         |                         | DWConv         | 0.5649      | -      | -      |        |
|                         |                         | PWConv2        | 0.5767      | -      | -      |        |
|                         |                         | Head- $QKV$    | 0.9361      | -      | -      |        |
|                         | SSA                     | $Q_S$          | 0.7536      | -      | -      |        |
|                         |                         | $K_S$          | 0.0724      | -      | -      |        |
|                         |                         | $V_S$          | 0.1860      | -      | -      |        |
|                         |                         | Linear         | 0.5488      | -      | -      |        |
|                         |                         | Channel MLP    | Linear1     | 1.0615 | -      | -      |
| TransFormer Spike Block | SepSpikeConv            | Linear2        | 0.0453      | -      | -      |        |
|                         |                         | PWConv1        | 0.8718      | -      | -      |        |
|                         |                         | DWConv         | 0.2728      | -      | -      |        |
|                         |                         | PWConv2        | 0.2346      | -      | -      |        |
|                         |                         | Head- $QKV$    | 0.4639      | -      | -      |        |
|                         | SSA                     | $Q_S$          | 1.0436      | -      | -      |        |
|                         |                         | $K_S$          | 0.0690      | -      | -      |        |

|      |                         |                |            |        |        |
|------|-------------------------|----------------|------------|--------|--------|
|      | Channel MLP             | $V_S$          | 0.0402     | -      | -      |
|      |                         | Linear         | 0.2674     | -      | -      |
|      |                         | Linear1        | 0.1904     | -      | -      |
|      |                         | Linear2        | 0.0043     | -      | -      |
|      | Memory Retrieval Module | Head- $Q$      | 0.2893     | -      | -      |
|      |                         | $Q_S1$         | 0.2288     | 0.2511 | 0.2457 |
|      |                         | PWConv         | 1.4003     | 1.5141 | 1.4140 |
|      |                         | DWConv         | 0.2876     | 0.3126 | 0.3128 |
|      |                         | Project1       | Conv       | 0.3465 | 0.3634 |
|      |                         | $Q_S2$         | 0.5225     | 0.5534 | 0.5321 |
|      |                         | TemporalFusion | WeightMLP1 | 2.3932 | 2.5136 |
|      |                         |                | WeightMLP2 | 0.7827 | 0.8143 |
|      |                         | Project2       | Conv       | 0.5717 | -      |
|      |                         | Channel MLP    | Linear1    | 0.3105 | -      |
|      |                         |                | Linear2    | 0.2024 | -      |
| Head | Location                | Conv1          | 0.3149     | -      | -      |
|      |                         | Conv2          | 0.2198     | -      | -      |
|      |                         | Conv3          | 0.3037     | -      | -      |
|      |                         | Conv4          | 0.6767     | -      | -      |
|      |                         | Conv5          | 1.8021     | -      | -      |
|      | Offset                  | Conv1          | 0.3149     | -      | -      |
|      |                         | Conv2          | 0.2182     | -      | -      |
|      |                         | Conv3          | 0.3431     | -      | -      |
|      |                         | Conv4          | 0.5206     | -      | -      |
|      |                         | Conv5          | 0.6281     | -      | -      |
|      | Size                    | Conv1          | 0.3149     | -      | -      |
|      |                         | Conv2          | 0.2271     | -      | -      |
|      |                         | Conv3          | 0.3000     | -      | -      |
|      |                         | Conv4          | 0.6038     | -      | -      |
|      |                         | Conv5          | 0.5048     | -      | -      |

Table 4. Layer spiking firing rates of SpikeTrack-B256-T3 Template Branch.

|         |                         |              | T1      | T2     | T3     |
|---------|-------------------------|--------------|---------|--------|--------|
| Stage 1 | DownSampling            | Conv         | 1       | 1      | 1      |
|         | ConvFormer Spike Block  | SepSpikeConv | PWConv1 | 1.458  | 1.4853 |
|         |                         |              | DWConv  | 1.3534 | 1.3790 |
|         |                         |              | PWConv2 | 1.2563 | 1.3188 |
|         |                         | Channel Conv | Conv1   | 1.5297 | 1.5035 |
|         |                         |              | Conv2   | 0.2500 | 0.2496 |
| Stage 2 | DownSampling            | Conv         | 1.0752  | 1.0885 | 1.0787 |
|         | Memory Retrieval Module | Head- $KV$   | 0.5344  | 0.5987 | 0.5938 |
|         |                         | $V_S$        | 0.3571  | 0.3961 | 0.3985 |
|         |                         | $K_S$        | 0.2998  | 0.3259 | 0.3188 |
|         | ConvFormer Spike Block  | SepSpikeConv | PWConv1 | 0.6596 | 0.6715 |
|         |                         |              | DWConv  | 0.9408 | 0.9589 |
|         |                         |              | PWConv2 | 0.6114 | 0.6465 |
|         |                         | Channel Conv | Conv1   | 0.9114 | 0.9267 |
|         |                         |              | Conv2   | 0.1480 | 0.1460 |
| Stage 3 | DownSampling            | Conv         | 0.7826  | 0.7730 | 0.7694 |
|         | Memory Retrieval Module | Head- $KV$   | 0.6126  | 0.6834 | 0.6718 |
|         |                         | $V_S$        | 0.3057  | 0.3386 | 0.3369 |



|                         |                         |              |                         |              |         |        |        |        |
|-------------------------|-------------------------|--------------|-------------------------|--------------|---------|--------|--------|--------|
| Stage 4                 | ConvFormer Spike Block  | SepSpikeConv | $K_S$                   | 0.3060       | 0.3400  | 0.3313 |        |        |
|                         |                         |              | PWConv1                 | 0.6688       | 0.6766  | 0.6739 |        |        |
|                         |                         |              | DWConv                  | 0.9315       | 0.9402  | 0.9380 |        |        |
|                         |                         | Channel Conv | PWConv2                 | 0.5135       | 0.5246  | 0.5213 |        |        |
|                         |                         |              | Conv1                   | 0.6318       | 0.6374  | 0.6359 |        |        |
|                         |                         |              | Conv2                   | 0.0906       | 0.0903  | 0.0888 |        |        |
|                         | ConvFormer Spike Block  | SepSpikeConv | PWConv1                 | 0.9604       | 0.9774  | 0.9793 |        |        |
|                         |                         |              | DWConv                  | 0.5758       | 0.5904  | 0.5886 |        |        |
|                         |                         |              | PWConv2                 | 0.4773       | 0.4883  | 0.4884 |        |        |
|                         |                         | Channel Conv | Conv1                   | 0.6978       | 0.6975  | 0.7002 |        |        |
|                         |                         |              | Conv2                   | 0.0694       | 0.0680  | 0.0678 |        |        |
|                         |                         |              | DownSampling            |              | Conv    | 0.9081 | 0.9001 | 0.8983 |
|                         | Memory Retrieval Module | Head- $KV$   | 0.4755                  | 0.5012       | 0.5137  |        |        |        |
|                         |                         | $V_S$        | 0.4067                  | 0.4387       | 0.4539  |        |        |        |
|                         |                         | $K_S$        | 0.5307                  | 0.5693       | 0.5842  |        |        |        |
|                         | TransFormer Spike Block | SepSpikeConv | PWConv1                 | 0.4915       | 0.5026  | 0.5066 |        |        |
|                         |                         |              | DWConv                  | 0.8554       | 0.8717  | 0.8803 |        |        |
|                         |                         |              | PWConv2                 | 0.3502       | 0.3697  | 0.3749 |        |        |
|                         |                         |              | Head- $QKV$             | 0.5477       | 0.5811  | 0.5833 |        |        |
|                         |                         | SSA          | $Q_S$                   | 1.1002       | 1.2265  | 1.2395 |        |        |
|                         |                         |              | $K_S$                   | 0.2663       | 0.2994  | 0.3055 |        |        |
|                         |                         |              | $V_S$                   | 0.7438       | 0.7834  | 0.7932 |        |        |
|                         |                         |              | Linear                  | 2.1391       | 2.3258  | 2.3621 |        |        |
|                         |                         | Channel MLP  | Linear1                 | 0.6040       | 0.5976  | 0.5933 |        |        |
|                         |                         |              | Linear2                 | 0.0985       | 0.0980  | 0.0974 |        |        |
|                         |                         |              | TransFormer Spike Block | SepSpikeConv | PWConv1 | 0.7451 | 0.7327 | 0.7315 |
|                         |                         |              |                         |              | DWConv  | 0.7205 | 0.7095 | 0.7085 |
|                         | PWConv2                 | 0.4378       |                         |              | 0.4552  | 0.4575 |        |        |
| Head- $QKV$             | 0.7029                  | 0.7192       |                         |              | 0.7023  |        |        |        |
| SSA                     | $Q_S$                   | 0.7605       |                         | 0.7370       | 0.7062  |        |        |        |
|                         | $K_S$                   | 0.2392       |                         | 0.2287       | 0.2077  |        |        |        |
|                         | $V_S$                   | 0.4056       |                         | 0.4129       | 0.4003  |        |        |        |
|                         | Linear                  | 1.6298       |                         | 1.5722       | 1.3865  |        |        |        |
| Channel MLP             | Linear1                 | 0.7850       |                         | 0.7871       | 0.7767  |        |        |        |
|                         | Linear2                 | 0.1052       |                         | 0.1089       | 0.1039  |        |        |        |
| TransFormer Spike Block | SepSpikeConv            | PWConv1      | 0.7683                  | 0.7498       | 0.7574  |        |        |        |
|                         |                         | DWConv       | 0.5794                  | 0.5768       | 0.5805  |        |        |        |
|                         |                         | PWConv2      | 0.3307                  | 0.3437       | 0.3452  |        |        |        |
|                         |                         | Head- $QKV$  | 0.7291                  | 0.7302       | 0.7277  |        |        |        |
|                         | SSA                     | $Q_S$        | 0.7556                  | 0.7416       | 0.7483  |        |        |        |
|                         |                         | $K_S$        | 0.1557                  | 0.1395       | 0.1411  |        |        |        |
|                         |                         | $V_S$        | 0.5425                  | 0.5424       | 0.5408  |        |        |        |
|                         |                         | Linear       | 1.3957                  | 1.3158       | 1.3046  |        |        |        |
|                         | Channel MLP             | Linear1      | 0.8744                  | 0.8590       | 0.8692  |        |        |        |
|                         |                         | Linear2      | 0.0735                  | 0.0722       | 0.0723  |        |        |        |
| Memory Retrieval Module | Head- $KV$              | 0.8776       | 0.8964                  | 0.9105       |         |        |        |        |
|                         | $V_S$                   | 0.2765       | 0.3190                  | 0.3222       |         |        |        |        |
|                         | $K_S$                   | 0.2897       | 0.2831                  | 0.2953       |         |        |        |        |
| TransFormer Spike Block | SepSpikeConv            | PWConv1      | 0.8760                  | 0.8442       | 0.8623  |        |        |        |
|                         |                         | DWConv       | 0.6305                  | 0.6225       | 0.6328  |        |        |        |
|                         |                         | PWConv2      | 0.3151                  | 0.3138       | 0.3219  |        |        |        |
|                         |                         | Head- $QKV$  | 0.8052                  | 0.8112       | 0.8115  |        |        |        |
|                         | SSA                     | $Q_S$        | 0.6392                  | 0.6850       | 0.6665  |        |        |        |
|                         |                         |              |                         |              |         |        |        |        |

|         |                         |                         |             |        |         |        |
|---------|-------------------------|-------------------------|-------------|--------|---------|--------|
| Stage 5 | TransFormer Spike Block | Channel MLP             | $K_S$       | 0.1438 | 0.1365  | 0.1354 |
|         |                         |                         | $V_S$       | 0.4303 | 0.4325  | 0.4365 |
|         |                         |                         | Linear      | 1.1670 | 1.2427  | 1.2174 |
|         |                         |                         | Linear1     | 0.9013 | 0.8820  | 0.8989 |
|         |                         |                         | Linear2     | 0.0616 | 0.0599  | 0.0602 |
|         | TransFormer Spike Block | SepSpikeConv            | PWConv1     | 0.7866 | 0.7636  | 0.7793 |
|         |                         |                         | DWConv      | 0.6259 | 0.6263  | 0.6347 |
|         |                         |                         | PWConv2     | 0.3305 | 0.3450  | 0.3529 |
|         |                         |                         | Head- $QKV$ | 0.7390 | 0.7483  | 0.7388 |
|         |                         | SSA                     | $Q_S$       | 0.7814 | 0.8434  | 0.8010 |
|         |                         |                         | $K_S$       | 0.1488 | 0.1365  | 0.1227 |
|         |                         |                         | $V_S$       | 0.3419 | 0.3411  | 0.3399 |
|         |                         |                         | Linear      | 0.9959 | 1.0392  | 0.9468 |
|         |                         | Channel MLP             | Linear1     | 0.8848 | 0.8524  | 0.8672 |
|         |                         |                         | Linear2     | 0.0808 | 0.0799  | 0.0751 |
|         | TransFormer Spike Block | SepSpikeConv            | PWConv1     | 0.7143 | 0.6833  | 0.7108 |
|         |                         |                         | DWConv      | 0.5917 | 0.5949  | 0.5955 |
|         |                         |                         | PWConv2     | 0.2799 | 0.2859  | 0.2897 |
|         |                         |                         | Head- $QKV$ | 0.7315 | 0.7115  | 0.7250 |
|         |                         | SSA                     | $Q_S$       | 0.8245 | 0.8770  | 0.8687 |
|         |                         |                         | $K_S$       | 0.1935 | 0.1864  | 0.1898 |
|         |                         |                         | $V_S$       | 0.4987 | 0.4917  | 0.5064 |
|         |                         |                         | Linear      | 1.8150 | 1.8574  | 1.8907 |
|         |                         | Channel MLP             | Linear1     | 0.8072 | 0.7669  | 0.8002 |
|         |                         |                         | Linear2     | 0.1164 | 0.1183  | 0.1128 |
|         | DownSampling            |                         | Conv        | 0.3914 | 0.3706  | 0.3886 |
|         |                         | Memory Retrieval Module | Head- $KV$  | 1.0682 | 1.0843  | 1.0665 |
|         |                         |                         | $V_S$       | 0.1857 | 0.1970  | 0.1987 |
|         | $K_S$                   |                         | 0.2269      | 0.2089 | 0.2198  |        |
|         | TransFormer Spike Block | SepSpikeConv            | PWConv1     | 1.0331 | 1.0798  | 1.0915 |
|         |                         |                         | DWConv      | 0.4430 | 0.4637  | 0.4686 |
|         |                         |                         | PWConv2     | 0.3645 | 0.4348  | 0.4429 |
|         |                         |                         | Head- $QKV$ | 0.8320 | 0.8420  | 0.8145 |
|         |                         | SSA                     | $Q_S$       | 0.9074 | 0.9703  | 1.0095 |
|         |                         |                         | $K_S$       | 0.0435 | 0.0389  | 0.0375 |
|         |                         |                         | $V_S$       | 0.1377 | 0.1324  | 0.1297 |
|         |                         |                         | Linear      | 0.5249 | 0.4881  | 0.4730 |
|         |                         | Channel MLP             | Linear1     | 0.9349 | 0.9175  | 0.9127 |
|         |                         |                         | Linear2     | 0.0181 | 0.01697 | 0.0161 |
|         | TransFormer Spike Block | SepSpikeConv            | PWConv1     | 0.7944 | 0.7935  | 0.7932 |
|         |                         |                         | DWConv      | 0.1714 | 0.1775  | 0.1778 |
|         |                         |                         | PWConv2     | 0.1576 | 0.1701  | 0.1740 |
|         |                         |                         | Head- $QKV$ | 0.3908 | 0.3597  | 0.3534 |
|         |                         | SSA                     | $Q_S$       | 0.5916 | 0.6136  | 0.6324 |
|         |                         |                         | $K_S$       | 0.0311 | 0.0302  | 0.0299 |
|         |                         |                         | $V_S$       | 0.0268 | 0.0255  | 0.0246 |
|         |                         |                         | Linear      | 0.0421 | 0.0446  | 0.0520 |
|         |                         | Channel MLP             | Linear1     | 0.3862 | 0.3311  | 0.3099 |
|         |                         |                         | Linear2     | 0.0091 | 0.0077  | 0.0068 |
|         | Memory Retrieval Module |                         | Head- $KV$  | 0.8044 | 0.7835  | 0.7841 |
|         |                         | $V_S$                   | 0.3875      | 0.3687 | 0.3515  |        |
|         |                         | $K_S$                   | 0.3411      | 0.3344 | 0.3173  |        |

## References

- [1] Charlotte Frenkel, David Bol, and Giacomo Indiveri. Bottom-up and top-down approaches for the design of neuromorphic processing systems: Tradeoffs and synergies between natural and artificial intelligence. *Proceedings of the IEEE*, 111(6): 623–652, 2023. [1](#)
- [2] Mark Horowitz. 1.1 computing’s energy problem (and what we can do about it). In *2014 IEEE international solid-state circuits conference digest of technical papers (ISSCC)*, pages 10–14. IEEE, 2014. [2](#)
- [3] Zhenxin Lei, Man Yao, Jiakui Hu, Xinhao Luo, Yanye Lu, Bo Xu, and Guoqi Li. Spike2former: Efficient spiking transformer for high-performance image segmentation. In *AAAI*, pages 1364–1372, 2025. [2](#), [3](#)
- [4] Yimeng Shan, Zhenbang Ren, Haodi Wu, Wenjie Wei, Ruijie Zhu, Shuai Wang, Dehao Zhang, Yichen Xiao, Jieyuan Zhang, Kexin Shi, et al. Sdtrack: A baseline for event-based tracking via spiking neural networks. *arXiv preprint arXiv:2503.08703*, 2025. [4](#)
- [5] Jingjun Yang, Liangwei Fan, Jinpu Zhang, Xiangkai Lian, Hui Shen, and Dewen Hu. Fully spiking neural networks for unified frame-event object tracking. *arXiv preprint arXiv:2505.20834*, 2025.
- [6] Man Yao, Jiakui Hu, Zhaokun Zhou, Li Yuan, Yonghong Tian, Bo Xu, and Guoqi Li. Spike-driven transformer. *NeurIPS*, 36: 64043–64058, 2023.
- [7] Man Yao, Xuerui Qiu, Tianxiang Hu, Jiakui Hu, Yuhong Chou, Keyu Tian, Jianxing Liao, Luziwei Leng, Bo Xu, and Guoqi Li. Scaling spike-driven transformer with efficient spike firing approximation training. *IEEE TPAMI*, 2025.
- [8] Shihao Zou, Qingfeng Li, Wei Ji, Jingjing Li, Yongkui Yang, Guoqi Li, and Chao Dong. Spikevideoformer: An efficient spike-driven video transformer with hamming attention and  $\mathcal{O}(t)$  complexity. *arXiv preprint arXiv:2505.10352*, 2025. [2](#), [4](#)
